# Supplementary material for: Wissensstand und Fehlvorstellungen zu Vorsorgedokumenten – Ergebnisse einer Bürgerbefragung
Source: Springer Nature journal article supplement (doi:10.1007/s00103-023-03751-y), 2023-08-17
Supplement: MOESM1 [file 25932172]

## Ausschnitt aus dem Original-Fragebogen

### Teil 4: Wissen zu Vorsorgedokumenten

Kreuzen Sie jeweils an, welche Antwort Sie für richtig halten. Wenn Sie die Antwort nicht wissen, wählen Sie bitte „Weiß nicht“.

#### 4.1. Definitionen der Vorsorgedokumente

|    |                                                                                                                                                                                                                    |                                                                                                                                                                      |
|----|--------------------------------------------------------------------------------------------------------------------------------------------------------------------------------------------------------------------|----------------------------------------------------------------------------------------------------------------------------------------------------------------------|
| 28 | Hiermit können Sie im Voraus festlegen, ob bestimmte medizinische Maßnahmen durchzuführen oder zu unterlassen sind, falls Sie aufgrund eines Unfalls oder einer Erkrankungen nicht mehr selbst entscheiden können. | <input type="radio"/> Patientenverfügung<br><input type="radio"/> Vorsorgevollmacht<br><input type="radio"/> Betreuungsverfügung<br><input type="radio"/> Weiß nicht |
| 29 | Hiermit können Sie bestimmen, wer im Falle Ihrer Einwilligungs- oder Geschäftsunfähigkeit vom Gericht als Betreuer/in bestellt werden soll, sofern keine weiteren Vorkehrungen getroffen wurden.                   | <input type="radio"/> Patientenverfügung<br><input type="radio"/> Vorsorgevollmacht<br><input type="radio"/> Betreuungsverfügung<br><input type="radio"/> Weiß nicht |
| 30 | Hiermit bestimmen Sie eine Person, die stellvertretend für Sie Entscheidungen treffen kann, wenn Sie dazu nicht mehr in der Lage sind.                                                                             | <input type="radio"/> Patientenverfügung<br><input type="radio"/> Vorsorgevollmacht<br><input type="radio"/> Betreuungsverfügung<br><input type="radio"/> Weiß nicht |

#### 4.2. Spezifischere Fragen zu Vorsorgedokumenten

|    |                                                                                                                                                      |                                                                                                   |
|----|------------------------------------------------------------------------------------------------------------------------------------------------------|---------------------------------------------------------------------------------------------------|
| 31 | Vorsorgedokumente dienen dazu, den Willen eines Menschen für zukünftige Entscheidungen, die der Mensch nicht mehr selbst treffen kann, festzuhalten. | <input type="radio"/> Richtig<br><input type="radio"/> Falsch<br><input type="radio"/> Weiß nicht |
| 32 | Jede*r Bürger*in kann ab Volljährigkeit ein gültiges Vorsorgedokument erstellen.                                                                     | <input type="radio"/> Richtig<br><input type="radio"/> Falsch<br><input type="radio"/> Weiß nicht |
| 33 | Ein Mensch mit demenzieller Erkrankung kann grundsätzlich ab der Diagnose kein gültiges Vorsorgedokument mehr erstellen.                             | <input type="radio"/> Richtig<br><input type="radio"/> Falsch<br><input type="radio"/> Weiß nicht |
| 34 | Die ärztliche Schweigepflicht gilt nicht gegenüber Ehegatten.                                                                                        | <input type="radio"/> Richtig<br><input type="radio"/> Falsch<br><input type="radio"/> Weiß nicht |

#### **Information:** Die Patientenverfügung

- ▶ gilt für den Fall späterer Einwilligungsunfähigkeit
- ▶ bestimmt im Voraus die Einwilligung oder Nichteinwilligung in medizinische Behandlungsmaßnahmen
- ▶ legt die Lebens- bzw. Krankheitssituationen (z.B. aufgrund von Unfall oder Krankheit) fest, in denen die Verfügung gelten soll

(Bitte korrigieren Sie Ihre vorher gegebenen Antworten nicht!)

|    |                                                                                            |                                                                                                   |
|----|--------------------------------------------------------------------------------------------|---------------------------------------------------------------------------------------------------|
| 35 | Wenn keine Patientenverfügung vorliegt, müssen Ärzt*innen immer lebenserhaltend behandeln. | <input type="radio"/> Richtig<br><input type="radio"/> Falsch<br><input type="radio"/> Weiß nicht |
|----|--------------------------------------------------------------------------------------------|---------------------------------------------------------------------------------------------------|

|                                                                                                                                                                                                                                                                                                                                                                          |                                                                                                                                                                                                                  |                                                                                                   |
|--------------------------------------------------------------------------------------------------------------------------------------------------------------------------------------------------------------------------------------------------------------------------------------------------------------------------------------------------------------------------|------------------------------------------------------------------------------------------------------------------------------------------------------------------------------------------------------------------|---------------------------------------------------------------------------------------------------|
| 36                                                                                                                                                                                                                                                                                                                                                                       | Die Patientenverfügung muss durch eine/n Zeugen/Zeugin durch Unterschrift bestätigt werden.                                                                                                                      | <input type="radio"/> Richtig<br><input type="radio"/> Falsch<br><input type="radio"/> Weiß nicht |
| 37                                                                                                                                                                                                                                                                                                                                                                       | Eine notarielle Beglaubigung der Verfügung ist nicht notwendig.                                                                                                                                                  | <input type="radio"/> Richtig<br><input type="radio"/> Falsch<br><input type="radio"/> Weiß nicht |
| 38                                                                                                                                                                                                                                                                                                                                                                       | Ab dem Zeitpunkt der Erstellung steht der in der Patientenverfügung verschriftlichte Wille über dem aktuell geäußerten Willen.                                                                                   | <input type="radio"/> Richtig<br><input type="radio"/> Falsch<br><input type="radio"/> Weiß nicht |
| 39                                                                                                                                                                                                                                                                                                                                                                       | Bisher fehlt es an einer gesetzlichen Grundlage zum Umgang mit Patientenverfügungen in Deutschland.                                                                                                              | <input type="radio"/> Richtig<br><input type="radio"/> Falsch<br><input type="radio"/> Weiß nicht |
| 40                                                                                                                                                                                                                                                                                                                                                                       | Eine Patientenverfügung wird ausschließlich dann wirksam, wenn sich der/die Betroffene im Endstadium einer tödlichen Erkrankung befindet.                                                                        | <input type="radio"/> Richtig<br><input type="radio"/> Falsch<br><input type="radio"/> Weiß nicht |
| 41                                                                                                                                                                                                                                                                                                                                                                       | Eine Patientenverfügung ist auch ohne regelmäßige Aktualisierung gültig, selbst nach 20 Jahren.                                                                                                                  | <input type="radio"/> Richtig<br><input type="radio"/> Falsch<br><input type="radio"/> Weiß nicht |
| 42                                                                                                                                                                                                                                                                                                                                                                       | Mit einer Patientenverfügung kann man nur medizinische Maßnahmen ablehnen.                                                                                                                                       | <input type="radio"/> Richtig<br><input type="radio"/> Falsch<br><input type="radio"/> Weiß nicht |
| <b>Information: Die Vorsorgevollmacht</b> <ul style="list-style-type: none"> <li>▶ wird (in der Regel erst) wirksam bei Einwilligungsunfähigkeit</li> <li>▶ bestimmt im Voraus eine oder mehrere Personen, die stellvertretend für Sie Entscheidungen in festgelegten Lebensbereichen treffen kann/können, bspw. in Gesundheits- und Vermögensangelegenheiten</li> </ul> |                                                                                                                                                                                                                  |                                                                                                   |
| 43                                                                                                                                                                                                                                                                                                                                                                       | Wenn man eine Vorsorgevollmacht hat, muss kein/e gesetzliche/r Betreuer*in mehr bestellt werden.                                                                                                                 | <input type="radio"/> Richtig<br><input type="radio"/> Falsch<br><input type="radio"/> Weiß nicht |
| 44                                                                                                                                                                                                                                                                                                                                                                       | Der/die Bevollmächtigte ist verpflichtet nach dem Willen des/der Patienten/Patientin zu handeln.                                                                                                                 | <input type="radio"/> Richtig<br><input type="radio"/> Falsch<br><input type="radio"/> Weiß nicht |
| 45                                                                                                                                                                                                                                                                                                                                                                       | Der/die Bevollmächtigte in Gesundheitsangelegenheiten darf darüber entscheiden, ob lebenserhaltende Maßnahmen eingestellt werden.                                                                                | <input type="radio"/> Richtig<br><input type="radio"/> Falsch<br><input type="radio"/> Weiß nicht |
| 46                                                                                                                                                                                                                                                                                                                                                                       | Mit einer Vorsorgevollmacht kann bestimmt werden, ob die bevollmächtigte Person auch über freiheitsentziehende Maßnahmen entscheiden darf (z.B. zwangsweise Unterbringung in Psychiatrie, Fixierung/Festbinden). | <input type="radio"/> Richtig<br><input type="radio"/> Falsch<br><input type="radio"/> Weiß nicht |
| <b>Information: Die Betreuungsverfügung</b> <ul style="list-style-type: none"> <li>▶ Gilt für den späteren Fall einer Einwilligungsunfähigkeit</li> <li>▶ bestimmt im Voraus eine oder mehrere Personen, die vom Betreuungsgericht als rechtliche Betreuer bestellt werden sollen</li> </ul>                                                                             |                                                                                                                                                                                                                  |                                                                                                   |
| 47                                                                                                                                                                                                                                                                                                                                                                       | Die gerichtliche Bestellung eines rechtlichen Betreuers kommt einer Entmündigung gleich.                                                                                                                         | <input type="radio"/> Richtig<br><input type="radio"/> Falsch<br><input type="radio"/> Weiß nicht |

|    |                                                                                                                                                                               |                                                                                                   |
|----|-------------------------------------------------------------------------------------------------------------------------------------------------------------------------------|---------------------------------------------------------------------------------------------------|
| 48 | Jede/r kann seine/n Betreuer/in frei festlegen.                                                                                                                               | <input type="radio"/> Richtig<br><input type="radio"/> Falsch<br><input type="radio"/> Weiß nicht |
| 49 | Eine Entscheidung des Betreuungsgerichts ist nur nötig, wenn sich Betreuer/in und behandelnde Ärzt*in nicht einig sind, ob eine Maßnahme dem Willen des Patienten entspricht. | <input type="radio"/> Richtig<br><input type="radio"/> Falsch<br><input type="radio"/> Weiß nicht |

4.3 Fallbeispiel: Es folgt ein Fall zur Anwendung von Vorsorgedokumenten. Bitte entscheiden Sie für jede Situation, ob Sie die Aussagen für richtig oder falsch halten. Wenn Sie sich unsicher sind, wählen Sie bitte „Weiß nicht“.

|                                                                                                                                                                                                                                                                                                                                                                                                                                                                                                                                                                                                        |                                                                                                                                                                            |                                                                                                   |
|--------------------------------------------------------------------------------------------------------------------------------------------------------------------------------------------------------------------------------------------------------------------------------------------------------------------------------------------------------------------------------------------------------------------------------------------------------------------------------------------------------------------------------------------------------------------------------------------------------|----------------------------------------------------------------------------------------------------------------------------------------------------------------------------|---------------------------------------------------------------------------------------------------|
| <p>Eine 81-jährige Frau erleidet mehrere Schlaganfälle. Als Folge ist sie blind, linksseitig gelähmt, nicht in der Lage zu sitzen und geistig nicht orientiert. Ein Gespräch ist nicht möglich. Sie kann keine Nahrung schlucken. Ohne ausreichende Nahrungs- und Flüssigkeitszufuhr wird sie binnen circa sechs Wochen versterben. Der behandelnde Arzt im Krankenhaus schlägt vor, mittels einer Operation eine Magensonde über die Bauchdecke einzuführen, um die Versorgung sicherzustellen.</p> <p>Der Sohn wendet jedoch ein, dass seine Mutter einen solchen Zustand niemals gewollt hätte.</p> |                                                                                                                                                                            |                                                                                                   |
| Wie hätte die Frau schon <u>vor</u> der plötzlichen Erkrankung Vorsorge treffen können?                                                                                                                                                                                                                                                                                                                                                                                                                                                                                                                |                                                                                                                                                                            |                                                                                                   |
| 50                                                                                                                                                                                                                                                                                                                                                                                                                                                                                                                                                                                                     | Gar nicht. Die Ärzt*innen müssen eine Magensode legen, da sonst Lebensgefahr besteht.                                                                                      | <input type="radio"/> Richtig<br><input type="radio"/> Falsch<br><input type="radio"/> Weiß nicht |
| 51                                                                                                                                                                                                                                                                                                                                                                                                                                                                                                                                                                                                     | Mithilfe einer Patientenverfügung hätte sie das Legen der Magensonde ablehnen können.                                                                                      | <input type="radio"/> Richtig<br><input type="radio"/> Falsch<br><input type="radio"/> Weiß nicht |
| 52                                                                                                                                                                                                                                                                                                                                                                                                                                                                                                                                                                                                     | Mithilfe einer Vorsorgevollmacht hätte sie eine/n Bevollmächtigte/n bestimmen können, der/die ihre Wünsche kennt und in ihrem Namen den Eingriff ablehnt.                  | <input type="radio"/> Richtig<br><input type="radio"/> Falsch<br><input type="radio"/> Weiß nicht |
| <p>Angenommen, die Frau hat eine Patientenverfügung erstellt. Darin steht, dass sie im Falle einer schweren Pflegebedürftigkeit keine künstliche Ernährung (Magensonde) wünscht. Was meinen Sie: Wie müssen die Ärzt*innen nun damit verfahren?</p>                                                                                                                                                                                                                                                                                                                                                    |                                                                                                                                                                            |                                                                                                   |
| 53                                                                                                                                                                                                                                                                                                                                                                                                                                                                                                                                                                                                     | Bei eindeutigen Aussagen in der Patientenverfügung sind die Ärzt*innen zur Umsetzung der beschriebenen Willensäußerungen verpflichtet.                                     | <input type="radio"/> Richtig<br><input type="radio"/> Falsch<br><input type="radio"/> Weiß nicht |
| 54                                                                                                                                                                                                                                                                                                                                                                                                                                                                                                                                                                                                     | Die Frau hatte die Patientenverfügung <u>vor</u> ihrer schweren plötzlichen Krankheit erstellt. Deshalb wird sie in dieser Situation nicht wirksam.                        | <input type="radio"/> Richtig<br><input type="radio"/> Falsch<br><input type="radio"/> Weiß nicht |
| 55                                                                                                                                                                                                                                                                                                                                                                                                                                                                                                                                                                                                     | Die niedergeschriebenen Willensäußerungen sind wirksam, wenn wie hier die aktuelle Lebenssituation der in der Patientenverfügung beschriebenen Lebenssituation entspricht. | <input type="radio"/> Richtig<br><input type="radio"/> Falsch<br><input type="radio"/> Weiß nicht |
| 56                                                                                                                                                                                                                                                                                                                                                                                                                                                                                                                                                                                                     | Die medizinische Notwendigkeit der Behandlung steht an erster Stelle. Die Willenserklärung ist deshalb nachrangig.                                                         | <input type="radio"/> Richtig<br><input type="radio"/> Falsch<br><input type="radio"/> Weiß nicht |
| Welche Möglichkeiten bestehen in diesem Fall, wenn - dem Wunsch der Frau folgend - keine Magensonde gelegt werden würde?                                                                                                                                                                                                                                                                                                                                                                                                                                                                               |                                                                                                                                                                            |                                                                                                   |
| 57                                                                                                                                                                                                                                                                                                                                                                                                                                                                                                                                                                                                     | Die Ernährung wird eingestellt. Es werden pflegerische Maßnahmen durchgeführt und Leiden (Hunger/Durst) soweit wie möglich gelindert bis der Tod eintritt.                 | <input type="radio"/> Richtig<br><input type="radio"/> Falsch<br><input type="radio"/> Weiß nicht |

|    |                                                                                                                                                                                     |                                                                                                   |
|----|-------------------------------------------------------------------------------------------------------------------------------------------------------------------------------------|---------------------------------------------------------------------------------------------------|
| 58 | Um das Sterben nicht unnötig in die Länge zu ziehen, können die Ärzt*innen ein starkes Schlafmittel spritzen, welches den Todeseintritt angenehmer macht und schneller herbeiführt. | <input type="radio"/> Richtig<br><input type="radio"/> Falsch<br><input type="radio"/> Weiß nicht |
|----|-------------------------------------------------------------------------------------------------------------------------------------------------------------------------------------|---------------------------------------------------------------------------------------------------|

4.4. Zulässigkeit der Sterbehilfe: Nachfolgend werden 3 Beispiele von Sterbehilfe beschrieben. Die Einwilligung der Patient\*innen ist jeweils Voraussetzung für die Maßnahmen. Kreuzen Sie bitte jeweils an, ob Sie das Vorgehen nach deutscher Gesetzeslage für rechtlich zulässig halten oder für verboten.

|    |                                                                                                                                                                                                                                                                                                                                                                                                                                                                                                                                                                                                 |                                                                                                      |
|----|-------------------------------------------------------------------------------------------------------------------------------------------------------------------------------------------------------------------------------------------------------------------------------------------------------------------------------------------------------------------------------------------------------------------------------------------------------------------------------------------------------------------------------------------------------------------------------------------------|------------------------------------------------------------------------------------------------------|
| 59 | Die Atemnot eines 75-jährigen Covid-19-Patienten verschlechtert sich so stark, dass er künstlich beatmet werden muss. Im weiteren Verlauf zeigt sich aber, dass ein Überleben nicht realistisch ist. Um das Leiden nicht in die Länge zu ziehen, beschließen die Ärzt*innen die Beatmungsmaschine abzuschalten. Der Patient verstirbt daraufhin.                                                                                                                                                                                                                                                | <input type="radio"/> Zulässig<br><input type="radio"/> Verboten<br><input type="radio"/> Weiß nicht |
| 60 | Auf der Palliativstation liegt eine 56-jährige Patientin mit Brustkrebs im Endstadium. Die Absiedelungen der Krebszellen in den Knochen bereiten ihr starke Schmerzen. Als absehbar wird, dass der Tod innerhalb der nächsten Tage eintreten wird und die Patientin vor Schmerzen stöhnt und keine Ruhe findet, verabreicht der Stationsarzt ein starkes Schmerzmittel (Morphium) zur Schmerzlinderung. Er weiß und nimmt hierbei in Kauf, dass die Patientin durch die hohe Dosis früher versterben könnte als es der natürliche Krankheitsverlauf vorsieht, beabsichtigt dieses jedoch nicht. | <input type="radio"/> Zulässig<br><input type="radio"/> Verboten<br><input type="radio"/> Weiß nicht |
| 61 | Nach einem Verkehrsunfall mit schwerer Kopfverletzung erwacht ein 36-jähriger Mann mit schweren Lähmungen aller Gliedmaßen. Auch nach mehreren Monaten in einer Rehaklinik ist keine Besserung in Aussicht. Da er sich ein solches Leben auf Dauer nicht vorstellen kann, bittet er wiederholt und nachdrücklich die Ärzt*innen ihm zu einem friedvollen Sterben zu verhelfen. Die Ärzt*innen kommen seinem Willen nach und spritzen ihm ein hochdosiertes Schlafmittel, welches den Tod durch Atemstillstand herbeiführt.                                                                      | <input type="radio"/> Zulässig<br><input type="radio"/> Verboten<br><input type="radio"/> Weiß nicht |

|                                                                                                                     |                                                                                                                                                                   |                          |                          |                          |
|---------------------------------------------------------------------------------------------------------------------|-------------------------------------------------------------------------------------------------------------------------------------------------------------------|--------------------------|--------------------------|--------------------------|
| In der Zusammenschau: Wie leicht bzw. schwer fiel es Ihnen die Fragen aus dem Wissenstest in Teil 4 zu beantworten? |                                                                                                                                                                   |                          |                          |                          |
| 62                                                                                                                  | <input type="checkbox"/>                                                                                                                                          | <input type="checkbox"/> | <input type="checkbox"/> | <input type="checkbox"/> |
|                                                                                                                     | schwer                                                                                                                                                            | eher schwer              | eher leicht              | leicht                   |
| 63                                                                                                                  | Wie viel Prozent der 34 Fragen glauben Sie richtig beantwortet zu haben („Weiß nicht“ zählt als falsche Antwort)? _____ %                                         |                          |                          |                          |
| 64                                                                                                                  | Von diesen richtig beantworteten Fragen: Wie viele glauben Sie durch <b>Raten</b> und wie viele durch <b>Vorwissen</b> richtig beantwortet zu haben (insg. 100%)? |                          |                          |                          |
|                                                                                                                     | _____ % durch Raten                                                                                                                                               |                          |                          |                          |
|                                                                                                                     | _____ % durch Vorwissen                                                                                                                                           |                          |                          |                          |
